# Supplementary material for: The Microbiome, Epigenome, and Diet in Adults with Obesity during Behavioral Weight Loss
Source: MDPI journal article supplement (doi:10.3390/nu15163588), 2023-08-16

**Figure S1.** Scatterplots of baseline cross-sectional associations between DNAm in genes within metabolically-relevant KEGG pathways and gut microbial taxa abundance

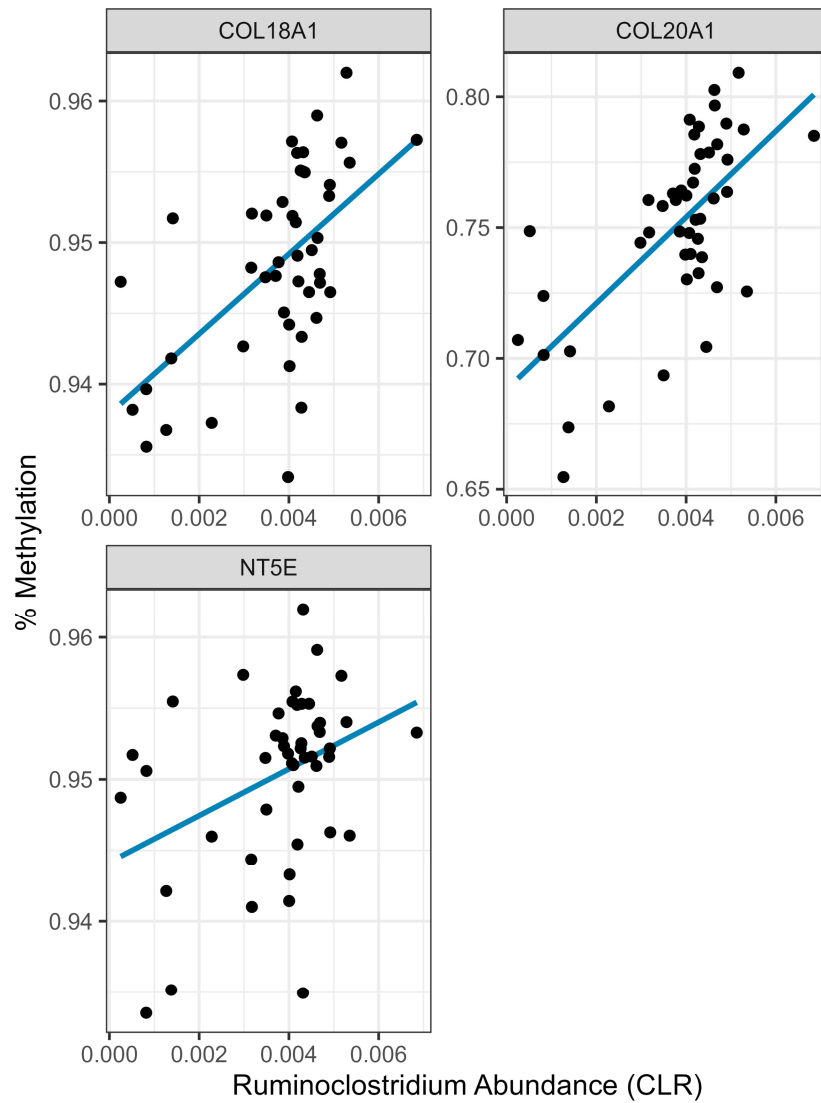

**Figure S2.** Scatterplots of 3-month cross-sectional associations between DNAm in genes within metabolically-relevant KEGG pathways and gut microbial taxa abundance

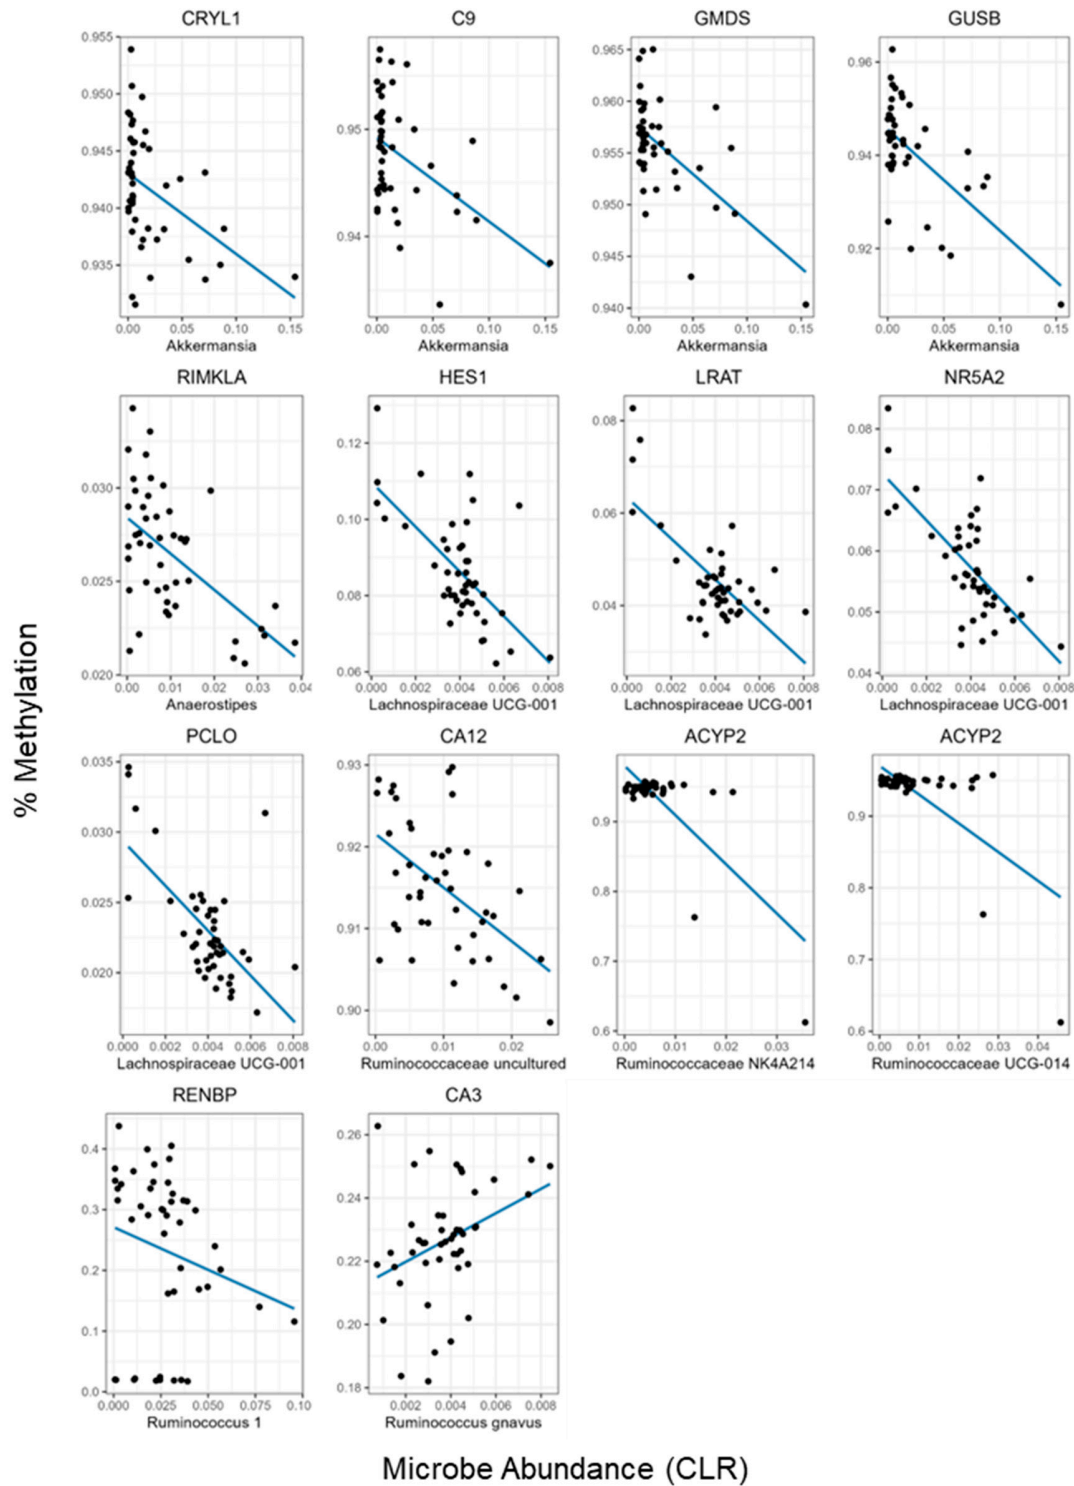

Supplement: s1 [file s1]
